# Supplementary material for: Production of a canine model of Parkinson’s disease using somatic cell nuclear transfer
Source: Research Square preprint supplement (doi:10.21203/rs.3.rs-1543785/v1), 2022-04-19
Supplement: Supplementary file 1 [file a5f4f7770024efd874fb56ce.docx]

**Supplementary Information**

**Supplementary video S1** Video showing human protein deglycase DJ-1 gene (*hDJ-1*)-overexpressing transgenic (TG) dog trying to get up

**Supplementary video S2** 10-m running test of control dogs

**Supplementary video S3** 10-m running test of human protein deglycase DJ-1 gene (*hDJ-1*)-overexpressing transgenic (TG) dog

**Supplementary video S4** Upon hearinghuman voices, the offspring of human protein deglycase DJ-1 gene (*hDJ-1*)-overexpressing transgenic (TG) dog could not get up. It showed a behavior similar to that of the hDJ-1 TG dog.
